# Supplementary material for: Estimating the Burden of Stroke: Two-Year Societal Costs and Generic Health-Related Quality of Life of the Restore4Stroke Cohort
Source: MDPI journal article supplement (doi:10.3390/ijerph191711110), 2022-09-05
Supplement: s1 [file s1]

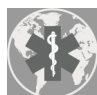

Supplementary S2. Table Cost prices by categories.

| Cost category                   | Volume         | Cost (€) |
|---------------------------------|----------------|----------|
| <b>Healthcare costs</b>         |                |          |
| General practitioner            | Contact        | 34.34    |
| Specialist                      | Contact        | 117.59   |
| Allied health professionals     | Contact        | 33.82    |
| Mental healthcare professionals | Contact        | 101.98   |
| Rehabilitation treatments       | Day            | 287.22   |
| Hospital                        | Overnight stay | 668.09   |
| Rehabilitation clinic           | Overnight stay | 478.70   |
| Nursing home                    | Overnight stay | 174.83   |
| Psychiatric clinic              | Overnight stay | 314.65   |
| Medication                      | Various        |          |
| <b>Non-healthcare costs</b>     |                |          |
| Paid help                       | Hours          | 20.81    |
| Informal unpaid care            | Hours          | 14.57    |
| Unpaid labor                    | Day            | 116.55   |
| Paid labor                      |                |          |
| Men                             | Day            | 315.52   |
| Women                           | Day            | 263.07   |

Prices are derived from the Dutch Manual for Cost analyses [1] and indexed to the reference year 2018. Medication were calculated making use of [medicijnkosten.nl](https://medicijnkosten.nl/) [2] and daily consumed dosages.

## References

1. Zorginstituut Nederland, Guideline for Cost Research: Methodology and Reference Prices for Economic Evaluations in Healthcare (in Dutch), **2016**. Available online: [https://www.genesyze.com/resource\\_guide/zorginstituut-nederland-2016-guideline-economic-evaluations-healthcare-netherlands/](https://www.genesyze.com/resource_guide/zorginstituut-nederland-2016-guideline-economic-evaluations-healthcare-netherlands/) (accessed on 9 September 2019).
2. Medicijnkosten.nl. Available online: <https://medicijnkosten.nl/> (accessed on 10 September 2019).
